# Supplementary material for: Deregulation of the Purine Pathway in Pre-Transplant Liver Biopsies Is Associated with Graft Function and Survival after Transplantation
Source: PubMed Central journal article supplement (PMC7141328; doi:10.3390/jcm9030711), 2020-03-05
Supplement: jcm-09-00711-s001.pdf [file jcm-09-00711-s001.pdf]

Supplementary materials for:

**Deregulation of the purine pathway in pre-transplant liver biopsies  
associates with graft function and survival after transplantation**

Jin Xu, Mohammad Hassan-Ally, Ana María Casas-Ferreira, Tommi Suvitaival, Yun  
Ma, Hector Vilca-Melendez, Mohamed Rela, Nigel Heaton, Wayel Jassem\*, Cristina  
Legido-Quigley\*

\*Correspondence and requests for materials should be addressed to:

**Cristina Legido-Quigley:** [cristina.legido.quigley@regionh.dk](mailto:cristina.legido.quigley@regionh.dk)

**Wayel Jassem:** [wayel.jassem@kcl.ac.uk](mailto:wayel.jassem@kcl.ac.uk)

**Table S1.** Misclassification table for the test dataset based on the training dataset model.

| True classes   | Calculated classes |     |          |
|----------------|--------------------|-----|----------|
|                | DBD                | DCD | Accuracy |
| DBD            | 5                  | 0   | 100%     |
| DCD            | 1                  | 6   | 85.71%   |
| Total          |                    | 12  | 91.67%   |
| Fisher's prob. |                    |     | 0.0076   |

**Table S2.** Annotation of markers based on molecular weight, retention time and collision induced dissociation fragmentation of 5 metabolites.

| Identified as                | m/z    | Retention time (min) | Observed ion       | QC RSD (%) |
|------------------------------|--------|----------------------|--------------------|------------|
| <b>Adenine monophosphate</b> | 348.08 | 17.3                 | [M+H] <sup>+</sup> | 12.80      |
| <b>Adenosine</b>             | 268.10 | 14.2                 | [M+H] <sup>+</sup> | 5.88       |
| <b>Adenine</b>               | 136.06 | 17.1                 | [M+H] <sup>+</sup> | 7.16       |
| <b>Hypoxanthine</b>          | 137.05 | 9.75                 | [M+H] <sup>+</sup> | 6.07       |
| <b>Urate</b>                 | 169.04 | 11.8                 | [M+H] <sup>+</sup> | 21.33      |

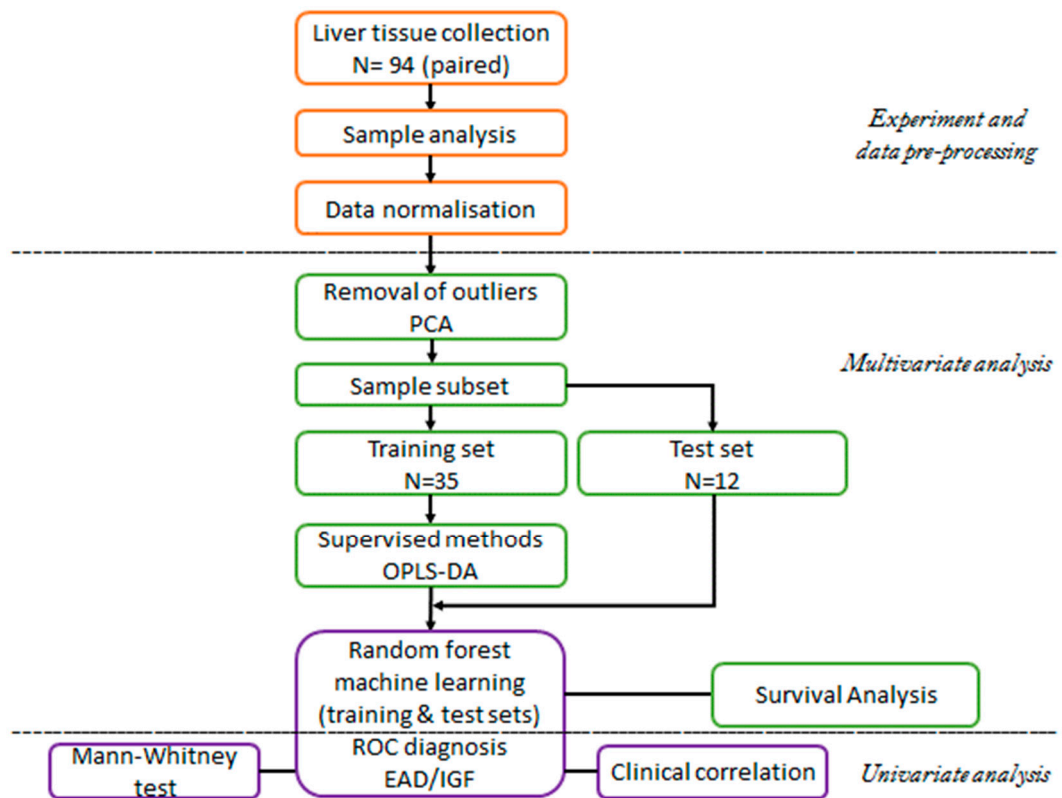

Figure S1. Study workflow.

PCA, principle component analysis; OPLS-DA, orthogonal projections to latent structures-discriminant analysis; EAD; early allograft dysfunction; IGF, immediate graft function; ROC, receiver operating characteristic.

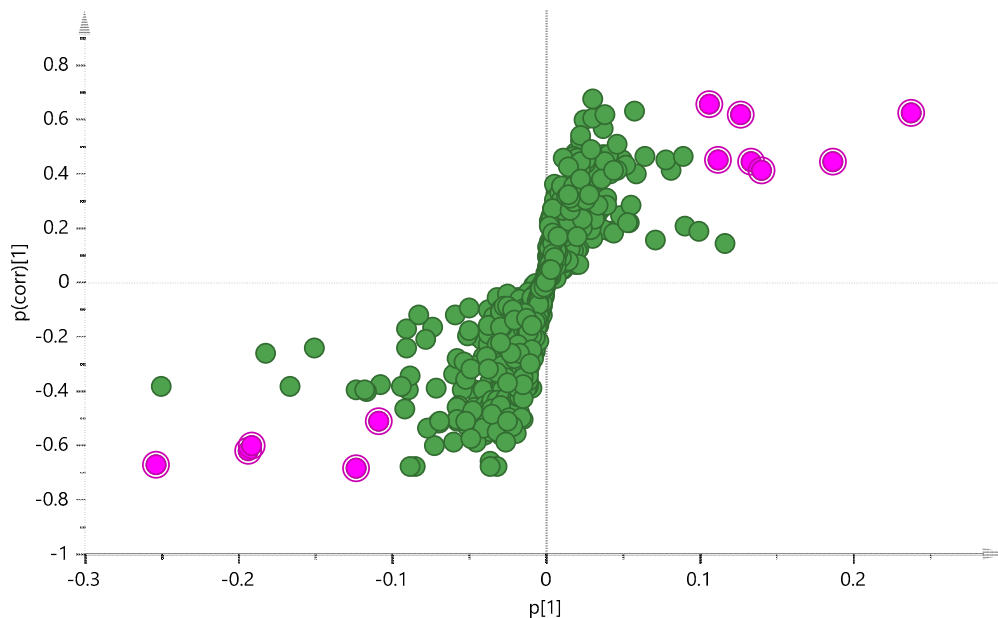

Figure S2. Metabolic feature selection from the S-plot.

All the dots represent detected features, and the pink dots were selected for annotation.

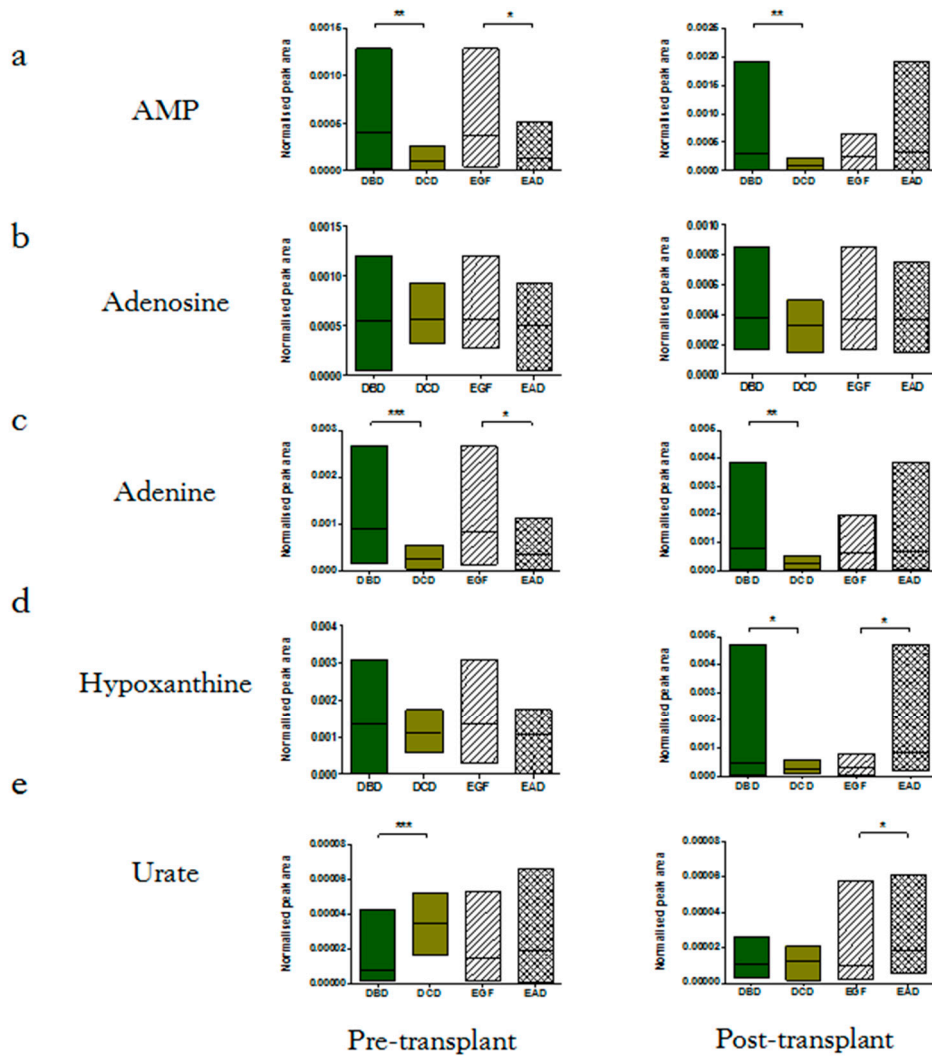

**Figure S3.** Box plots of 5 metabolites in four groups at both transplant stages. (A) AMP, (B) Adenosine, (C) Adenine, (D) Hypoxanthine and (E) Urate.

AMP, adenosine monophosphate; DBD, donation after brain death; DCD, donation after circulatory death; EGF, early graft function; EAD, early allograft dysfunction. Results represented as low-mean-high, p-value was derived from Mann-Whitney test, followed by Benjamini-Hochberg FDR correction (\* $q < 0.05$ , \*\* $q < 0.01$ , \*\*\* $q < 0.001$ ).

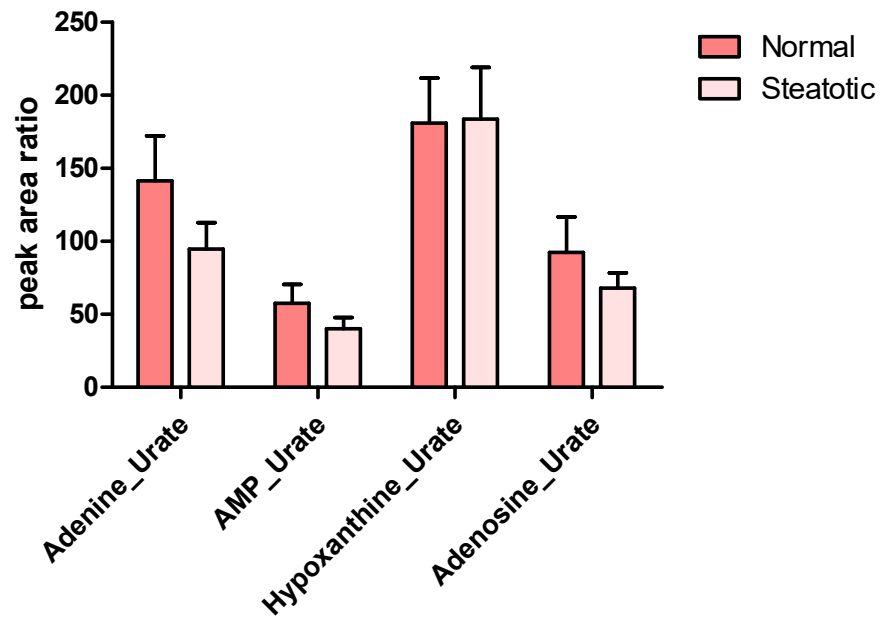

**Figure S4.** Bar plots of 4 purine ratios in normal (no steatotic, n=21) and steatotic (mild and moderate steatotic, n=26) groups.

AMP, adenosine monophosphate. Results represented as mean with SEM.
